# Supplementary material for: Chlorophyll-a Detection Algorithms at Different Depths Using In Situ, Meteorological, and Remote Sensing Data in a Chilean Lake
Source: MDPI journal article supplement (doi:10.3390/rs16040647), 2024-02-09
Supplement: s1 [file s1]

## Supplementing Information

Table S1. Limnological parameters in summer season

| Parameters                         |         | Centro Station |       |        |       | Los Llolles Station |       |       |        |
|------------------------------------|---------|----------------|-------|--------|-------|---------------------|-------|-------|--------|
| Depht (m)                          |         | 0              | 10    | 15     | 30    | 0                   | 10    | 15    | 30     |
| Chl-a ( $\mu\text{g/L}$ )          | Average | 0.55           | 1.59  | 1.15   | 0.52  | 0.75                | 1.59  | 1.12  | 0.70   |
|                                    | Max     | 1.80           | 2.52  | 3.10   | 0.9   | 1.8                 | 2.52  | 2.3   | 0.90   |
|                                    | Min     | 0.30           | 0.35  | 0.40   | 0.30  | 0.2                 | 0.35  | 0.4   | 0.50   |
|                                    | SD      | 0.48           | 1.11  | 1.09   | 0.25  | 0.68                | 1.11  | 0.83  | 0.28   |
|                                    | CV(%)   | 0.87           | 0.69  | 0.94   | 0.48  | 0.91                | 0.69  | 0.74  | 0.40   |
|                                    | N       | 9              | 3     | 6      | 8     | 7                   | 3     | 5     | 2      |
| SD (m)                             | Average | 11.4           | 10.60 | 11.66  | 11.40 | 12                  | 10.60 | 12    | 14.16  |
|                                    | Max     | 19.5           | 12.80 | 19.50  | 19.50 | 16                  | 12.80 | 13.9  | 16     |
|                                    | Min     | 5.50           | 9     | 5.50   | 5.50  | 9                   | 9     | 9     | 13     |
|                                    | SD      | 3.46           | 1.96  | 4.09   | 3.62  | 2.47                | 1.96  | 2.47  | 1.60   |
|                                    | CV(%)   | 0.30           | 0.18  | 0.35   | 0.31  | 0.21                | 0.18  | 0.20  | 0.11   |
|                                    | N       | 13             | 3     | 9      | 12    | 8                   | 3     | 8     | 3      |
| Temperature ( $^{\circ}\text{C}$ ) | Average | 19.98          | 18.19 | 16.01  | 10.05 | 19.09               | 18.19 | 15.97 | 8.87   |
|                                    | Max     | 21.98          | 19.31 | 18.56  | 11.42 | 20.68               | 19.31 | 17.9  | 9.13   |
|                                    | Min     | 18.22          | 16.69 | 12.79  | 8.99  | 17.34               | 16.69 | 14.11 | 8.62   |
|                                    | SD      | 1.45           | 1.35  | 1.71   | 0.68  | 1.23                | 1.35  | 1.17  | 0.36   |
|                                    | CV(%)   | 0.07           | 0.07  | 0.10   | 0.06  | 0.06                | 0.07  | 0.07  | 0.04   |
|                                    | N       | 11             | 3     | 8      | 11    | 7                   | 3     | 7     | 2      |
| NT (mg/L)                          | Average | 62.56          | 0.02  | 153.73 | 95.71 | 162.2               | 0.02  | 115.8 | 153.73 |
|                                    | Max     | 240.1          | 0.01  | 374.4  | 410.7 | 398.3               | 0.01  | 388.9 | 374.4  |
|                                    | Min     | 0.01           | 0.034 | 23.80  | 0.03  | 21.40               | 0.034 | 25.3  | 23.80  |
|                                    | SD      | 101.1          | 0.01  | 192.1  | 177.7 | 205.7               | 0.01  | 205.2 | 192.1  |
|                                    | CV(%)   | 1.61           | 0.5   | 1.24   | 1.85  | 1.26                | 0.5   | 1.76  | 1.24   |
|                                    | N       | 5              | 2     | 3      | 5     | 3                   | 2     | 3     | 3      |
| PT (mg/L)                          | Average | 11.09          | 10.43 | 9.78   | 4.96  | 6.73                | 10.43 | 5.47  | 9.78   |
|                                    | Max     | 33.40          | 49.45 | 56.50  | 6.70  | 7.20                | 49.45 | 8.10  | 56.50  |
|                                    | Min     | 2.80           | 2.9   | 3      | 3     | 6.30                | 2.9   | 4.10  | 3      |
|                                    | SD      | 12.65          | 11.08 | 9.52   | 1.51  | 0.45                | 11.08 | 2.03  | 9.52   |
|                                    | CV(%)   | 1.14           | 1.05  | 0.97   | 0.30  | 0.06                | 1.05  | 0.37  | 0.97   |
|                                    | N       | 5              | 5     | 5      | 4     | 3                   | 5     | 3     | 5      |
| Turbidity (NTU)                    | Average | 1.75           | 0.90  | 3      | 3.15  | 2.5                 | 0.90  | 2.75  | 3      |
|                                    | Max     | 4              | 1.10  | 4.10   | 5.40  | 3.40                | 1.10  | 4     | 4.10   |
|                                    | Min     | 0.70           | 0.70  | 1.90   | 1.40  | 1.60                | 0.70  | 1.90  | 1.90   |
|                                    | SD      | 1.52           | 0.20  | 1.10   | 2.01  | 1.27                | 0.20  | 1.15  | 1.10   |

|  |       |      |      |      |      |     |      |      |      |
|--|-------|------|------|------|------|-----|------|------|------|
|  | CV(%) | 0.86 | 0.22 | 0.36 | 0.63 | 0.5 | 0.22 | 0.41 | 0.36 |
|  | N     | 4    | 3    | 3    | 4    | 2   | 3    | 3    | 3    |

Table S2. Limnological parameters in autumn season

| Parameters       |         | Centro Station |       |       |       | Los Llolles Station |       |       |       |
|------------------|---------|----------------|-------|-------|-------|---------------------|-------|-------|-------|
| Depht (m)        |         | 0              | 10    | 15    | 30    | 0                   | 10    | 15    | 30    |
| Chl-a (µg/L)     | Average | 1.32           | 0.96  | 0.96  | 0.67  | 1.08                | 1.04  | 1.04  | 0.67  |
|                  | Max     | 1.70           | 1.40  | 1.40  | 1.30  | 1.30                | 1.70  | 1.70  | 1.30  |
|                  | Min     | 0.60           | 0.30  | 0.30  | 0.20  | 0.50                | 0.20  | 0.20  | 0.20  |
|                  | SD      | 0.52           | 0.46  | 0.46  | 0.45  | 0.33                | 0.66  | 0.66  | 0.45  |
|                  | CV(%)   | 0.39           | 0.47  | 0.47  | 0.67  | 0.30                | 0.63  | 0.63  | 0.67  |
|                  | N       | 4              | 5     | 5     | 4     | 5                   | 5     | 5     | 4     |
| SD (m)           | Average | 8.56           | 8.56  | 8.56  | 8.56  | 8.50                | 8.50  | 8.50  | 8.56  |
|                  | Max     | 14.35          | 14.35 | 14.35 | 14.35 | 11.20               | 11.20 | 11.20 | 14.35 |
|                  | Min     | 2.95           | 3.50  | 3.50  | 2.95  | 2.56                | 2.56  | 2.56  | 2.95  |
|                  | SD      | 3.93           | 3.98  | 3.98  | 3.93  | 3.41                | 3.41  | 3.41  | 3.93  |
|                  | CV(%)   | 0.46           | 0.46  | 0.46  | 0.46  | 0.40                | 0.40  | 0.40  | 0.46  |
|                  | N       | 9              | 9     | 9     | 9     | 9                   | 9     | 9     | 9     |
| Temperature (°C) | Average | 11.15          | 10.87 | 10.87 | 10.44 | 11.17               | 10.93 | 10.93 | 10.44 |
|                  | Max     | 12.36          | 11.83 | 11.83 | 11.56 | 12.41               | 12.11 | 12.11 | 11.56 |
|                  | Min     | 9.91           | 9.90  | 9.90  | 9.81  | 9.95                | 9.97  | 9.97  | 9.81  |
|                  | SD      | 0.81           | 0.63  | 0.63  | 0.48  | 0.76                | 0.59  | 0.59  | 0.48  |
|                  | CV(%)   | 0.07           | 0.05  | 0.05  | 0.04  | 0.06                | 0.05  | 0.05  | 0.04  |
|                  | N       | 9              | 9     | 9     | 9     | 9                   | 9     | 9     | 9     |
| NT (mg/L)        | Average | 114.6          | 75.90 | 75.90 | 83.26 | 110.8               | 93.26 | 93.26 | 83.26 |
|                  | Max     | 220.1          | 169.5 | 169.5 | 186.2 | 158.3               | 136.8 | 136.8 | 186.2 |
|                  | Min     | 36             | 24    | 24    | 57    | 44                  | 62    | 62    | 57    |
|                  | SD      | 93.26          | 73.31 | 73.31 | 57.55 | 61.05               | 30.70 | 30.70 | 57.55 |
|                  | CV(%)   | 0.81           | 0.96  | 0.96  | 0.69  | 0.55                | 0.32  | 0.32  | 0.69  |
|                  | N       | 5              | 5     | 5     | 5     | 5                   | 5     | 5     | 5     |
| PT (mg/L)        | Average | 7.86           | 6.76  | 6.76  | 8.72  | 6.02                | 6.02  | 6.02  | 8.72  |
|                  | Max     | 17.30          | 7.70  | 7.70  | 11.30 | 7.60                | 6.70  | 6.70  | 11.30 |
|                  | Min     | 4.80           | 6     | 6     | 5.60  | 4.80                | 5.10  | 5.10  | 5.60  |
|                  | SD      | 5.66           | 0.75  | 0.75  | 2.52  | 1.43                | 0.62  | 0.62  | 2.52  |
|                  | CV(%)   | 0.72           | 0.11  | 0.11  | 0.28  | 0.23                | 0.10  | 0.10  | 0.28  |
|                  | N       | 5              | 5     | 5     | 5     | 5                   | 5     | 5     | 5     |

|                 |         |      |      |      |      |      |     |     |      |
|-----------------|---------|------|------|------|------|------|-----|-----|------|
| Turbidity (NTU) | Average | 0.94 | 1.06 | 1.06 | 1.92 | 1.50 | 1.8 | 1.8 | 1.92 |
|                 | Max     | 1.90 | 1.90 | 1.90 | 2.20 | 1.70 | 1.8 | 1.8 | 2.20 |
|                 | Min     | 0.10 | 0.30 | 0.30 | 1.60 | 1.30 | 1.8 | 1.8 | 1.60 |
|                 | SD      | 0.91 | 0.81 | 0.81 | 0.30 | 0.23 | 0   | 0   | 0.30 |
|                 | CV(%)   | 9.68 | 0.76 | 0.76 | 0.15 | 0.15 | 0   | 0   | 0.15 |
|                 | N       | 5    | 5    | 5    | 5    | 4    | 4   | 4   | 5    |

Table S3. Limnological parameters in winter season

| Parameters       |         | Centro Station |       |       |       | Los Llolles Station |       |       |       |
|------------------|---------|----------------|-------|-------|-------|---------------------|-------|-------|-------|
| Depht (m)        |         | 0              | 10    | 15    | 30    | 0                   | 10    | 15    | 30    |
| Chl-a (µg/L)     | Average | 0.57           | 0.42  | 0.42  | 0.56  | 0.85                | 0.86  | 0.86  | 0.56  |
|                  | Max     | 1.50           | 0.60  | 0.60  | 1.10  | 1.20                | 1.30  | 1.30  | 1.10  |
|                  | Min     | 0.20           | 0.2   | 0.2   | 0.2   | 0.30                | 0.30  | 0.30  | 0.2   |
|                  | SD      | 0.48           | 0.14  | 0.14  | 0.32  | 0.41                | 0.44  | 0.44  | 0.32  |
|                  | CV(%)   | 0.84           | 0.33  | 0.33  | 0.57  | 0.48                | 0.51  | 0.51  | 0.57  |
|                  | N       | 7              | 5     | 5     | 6     | 6                   | 6     | 6     | 6     |
| SD (m)           | Average | 6.88           | 6.88  | 6.88  | 6.88  | 6.66                | 6.66  | 6.66  | 6.88  |
|                  | Max     | 10.5           | 10.5  | 10.5  | 10.5  | 8.50                | 8.50  | 8.50  | 10.5  |
|                  | Min     | 3.50           | 3.50  | 3.50  | 3.50  | 4                   | 4     | 4     | 3.50  |
|                  | SD      | 2.40           | 2.40  | 2.40  | 2.40  | 2.30                | 2.30  | 2.30  | 2.40  |
|                  | CV(%)   | 0.34           | 0.34  | 0.34  | 0.34  | 0.34                | 0.34  | 0.34  | 0.34  |
|                  | N       | 9              | 9     | 9     | 9     | 9                   | 9     | 9     | 9     |
| Temperature (°C) | Average | 8.52           | 8.25  | 8.25  | 8.15  | 8.43                | 8.22  | 8.22  | 8.15  |
|                  | Max     | 9.16           | 8.82  | 8.82  | 8.36  | 8.86                | 8.47  | 8.47  | 8.36  |
|                  | Min     | 8.02           | 7.96  | 7.96  | 7.96  | 8.07                | 8.01  | 8.01  | 7.96  |
|                  | SD      | 0.40           | 0.26  | 0.26  | 0.16  | 0.26                | 0.14  | 0.14  | 0.16  |
|                  | CV(%)   | 0.04           | 0.03  | 0.03  | 0.02  | 0.03                | 0.01  | 0.01  | 0.02  |
|                  | N       | 9              | 9     | 9     | 9     | 9                   | 9     | 9     | 9     |
| NT (mg/L)        | Average | 228.5          | 100.2 | 100.2 | 75.01 | 91.64               | 80.18 | 80.18 | 75.01 |
|                  | Max     | 939.1          | 164.1 | 164.1 | 203.2 | 220.1               | 208.3 | 208.3 | 203.2 |
|                  | Min     | 37             | 94    | 94    | 39    | 37                  | 11.6  | 11.6  | 39    |
|                  | SD      | 437.8          | 37.19 | 37.19 | 67.53 | 75.27               | 72    | 72    | 67.53 |
|                  | CV(%)   | 1.91           | 0.37  | 0.37  | 0.90  | 0.82                | 0.89  | 0.89  | 0.90  |
|                  | N       | 5              | 5     | 5     | 5     | 5                   | 5     | 5     | 5     |
| PT (mg/L)        | Average | 10.07          | 9.70  | 9.70  | 11.18 | 10.03               | 9.98  | 9.98  | 11.18 |
|                  | Max     | 23.60          | 17.20 | 17.20 | 25.80 | 16.10               | 22.2  | 22.2  | 25.80 |
|                  | Min     | 6.30           | 5.90  | 5.90  | 5.90  | 5.40                | 5     | 5     | 5.90  |
|                  | SD      | 6.34           | 4.08  | 4.08  | 7.40  | 3.62                | 5.88  | 5.88  | 7.40  |

|                    |         |      |      |      |      |      |      |      |      |
|--------------------|---------|------|------|------|------|------|------|------|------|
|                    | CV(%)   | 0.62 | 0.42 | 0.42 | 0.66 | 0.36 | 0.58 | 0.58 | 0.66 |
|                    | N       | 6    | 6    | 6    | 6    | 6    | 6    | 6    | 6    |
| Turbidity<br>(NTU) | Average | 1.75 | 2.02 | 2.02 | 1.85 | 2.20 | 1.96 | 1.96 | 1.85 |
|                    | Max     | 2.3  | 3.40 | 3.40 | 3.30 | 1.40 | 3.20 | 3.20 | 3.30 |
|                    | Min     | 0.2  | 0.60 | 0.60 | 0.20 | 0.40 | 0.30 | 0.30 | 0.20 |
|                    | SD      | 1.52 | 1.05 | 1.05 | 1.25 | 2.39 | 1.24 | 1.24 | 1.25 |
|                    | CV(%)   | 0.86 | 0.51 | 0.51 | 0.67 | 1.08 | 0.63 | 0.63 | 0.67 |
|                    | N       | 6    | 6    | 6    | 6    | 6    | 6    | 6    | 6    |

Table S4. Limnological parameters in spring season

| Parameters       |         | Centro Station |       |       |       | Los Llolles Station |       |       |       |
|------------------|---------|----------------|-------|-------|-------|---------------------|-------|-------|-------|
| Depht (m)        |         | 0              | 10    | 15    | 30    | 0                   | 10    | 15    | 30    |
| Chl-a (µg/L)     | Average | 0.98           | 1.78  | 1.58  | 1.19  | 1.18                | 1.78  | 2     | 1.19  |
|                  | Max     | 1.49           | 2.07  | 2.60  | 2     | 1.80                | 2.07  | 2.9   | 2     |
|                  | Min     | 0.20           | 0.4   | 0.8   | 0.50  | 0.70                | 0.4   | 1.1   | 0.50  |
|                  | SD      | 0.57           | 0.44  | 0.64  | 0.63  | 0.45                | 0.44  | 0.64  | 0.63  |
|                  | CV(%)   | 0.58           | 0.24  | 0.40  | 0.52  | 0.38                | 0.24  | 0.32  | 0.52  |
|                  | N       | 8              | 4     | 6     | 9     | 5                   | 4     | 5     | 9     |
| SD (m)           | Average | 9.27           | 10.25 | 8.47  | 9.27  | 8.50                | 10.25 | 8.5   | 9.27  |
|                  | Max     | 15             | 15    | 15    | 15    | 12.50               | 15    | 12.50 | 15    |
|                  | Min     | 4.50           | 8     | 4.5   | 4.50  | 5                   | 8     | 5     | 4.50  |
|                  | SD      | 3.45           | 3.20  | 3.67  | 3.45  | 2.85                | 3.20  | 2.85  | 3.45  |
|                  | CV(%)   | 0.37           | 0.31  | 0.43  | 0.37  | 0.33                | 0.31  | 0.33  | 0.37  |
|                  | N       | 12             | 4     | 8     | 12    | 8                   | 4     | 8     | 12    |
| Temperature (°C) | Average | 13.56          | 11.43 | 11.06 | 9.06  | 13.08               | 11.43 | 10.64 | 9.06  |
|                  | Max     | 16.34          | 14.91 | 13.25 | 9.65  | 14.60               | 14.91 | 12.65 | 9.65  |
|                  | Min     | 10.69          | 9.48  | 9.61  | 8.44  | 11.70               | 9.48  | 9.26  | 8.44  |
|                  | SD      | 1.72           | 2.39  | 1.19  | 0.35  | 1.18                | 2.39  | 1.10  | 0.35  |
|                  | CV(%)   | 0.12           | 0.20  | 0.10  | 0.03  | 0.09                | 0.20  | 0.10  | 0.03  |
|                  | N       | 12             | 4     | 8     | 12    | 8                   | 4     | 8     | 12    |
| NT (mg/L)        | Average | 31.28          | 0.02  | 66.70 | 50.63 | 73.22               | 0.02  | 66.42 | 50.63 |
|                  | Max     | 115.3          | 0.03  | 154.1 | 122.7 | 140.7               | 0.03  | 168.3 | 122.7 |
|                  | Min     | 0.01           | 0.01  | 34    | 0.01  | 20                  | 0.01  | 34    | 0.01  |
|                  | SD      | 45.95          | 0.01  | 64    | 68.37 | 60.76               | 0.01  | 78.85 | 68.37 |
|                  | CV(%)   | 1.46           | 0.50  | 0.95  | 1.35  | 0.82                | 0.50  | 1.18  | 1.35  |
|                  | N       | 6              | 5     | 5     | 6     | 5                   | 5     | 5     | 6     |
| PT (mg/L)        | Average | 9.52           | 3.77  | 10.33 | 8.13  | 10.33               | 3.77  | 9.10  | 8.13  |
|                  | Max     | 33.80          | 9.41  | 22.70 | 17.3  | 17.60               | 9.41  | 16.60 | 17.3  |

|                 |         |       |      |      |      |      |      |      |      |
|-----------------|---------|-------|------|------|------|------|------|------|------|
|                 | Min     | 0.05  | 0.05 | 3.20 | 0.03 | 3.10 | 0.05 | 3.20 | 0.03 |
|                 | SD      | 10.64 | 5.43 | 7.04 | 5.92 | 5.24 | 5.43 | 5.15 | 5.92 |
|                 | CV(%)   | 1.11  | 1.44 | 0.68 | 0.72 | 0.50 | 1.44 | 0.56 | 0.72 |
|                 | N       | 9     | 5    | 6    | 9    | 6    | 5    | 6    | 9    |
| Turbidity (NTU) | Average | 2.38  | 2.37 | 2.37 | 2.54 | 2.42 | 2.37 | 2.85 | 2.54 |
|                 | Max     | 3.40  | 3.70 | 3.70 | 4    | 4.40 | 3.70 | 5.10 | 4    |
|                 | Min     | 0.50  | 1.20 | 1.20 | 0.70 | 0.50 | 1.20 | 1.40 | 0.70 |
|                 | SD      | 1.41  | 1.13 | 1.13 | 1.34 | 1.61 | 1.13 | 1.69 | 1.34 |
|                 | CV(%)   | 0.59  | 0.47 | 0.47 | 0.52 | 0.66 | 0.47 | 0.59 | 0.52 |
|                 | N       | 6     | 4    | 4    | 5    | 4    | 4    | 4    | 5    |
